# Supplementary material for: Socio-demographic factors influencing the ownership and utilization of insecticide-treated bed nets among malaria vulnerable groups in the Buea Health District, Cameroon
Source: PubMed Central journal article supplement (PMC4167508; doi:10.1186/1756-0500-7-624), 2014-09-10
Supplement: 13104_2014_3153_MOESM1_ESM.pdf [file 13104_2014_3153_MOESM1_ESM.pdf]

**QUESTIONNAIRE ON**  
**SOCIO-DEMOGRAPHIC FACTORS INFLUENCING THE UTILIZATION OF**  
**INSECTICIDE TREATED BED NETS AMONG VULNERABLE - GROUPS IN**  
**BUEA HEALTH DISTRICT**

We are researchers from the University of Buea, carrying out a study on the above subject. We would be grateful if you will give complete and honest responses to the following questions. Your responses and the observations we make shall be kept strictly confidential and shall be used solely for the purpose of this research. If you have mosquito nets at home, we would like to see them and also take photographs of them just where they are in your room.

**A. DEMOGRAPHIC DATA**

1. Respondent ID No. \_\_\_\_\_ 2. Phone No: \_\_\_\_\_

3. Health Area \_\_\_\_\_ 4. Quarter/Community \_\_\_\_\_

5. Community Settlement: **1. Rural 2. Urban** 6. Tribe \_\_\_\_\_

7. Responsibility of Respondent: **1. Father**

**2. Mother**

**3. Eldest Sister/Brother**

8. Age \_\_\_\_\_ 9. Sex: **1. Male 2. Female**

**10. Level of Education:**

**11. Marital Status**

**12. Religion**

1. **None**

1. **Married**

1. **Christian**

2. **Primary**

2. **Single**

2. **Moslem**

3. **Secondary**

3. **Widow/Widower**

3. **Others**

4. **High school**

4. **Separated**

5. **University**

5. **Divorced**

13. Profession \_\_\_\_\_

14. Total number of people in the household \_\_\_\_\_

15. Number of children under five years in the household \_\_\_\_\_

16. Number of pregnant women in the household \_\_\_\_\_

17. Type of housing construction material:

1. **Plank**      2. **Blocks**

18. Type of window construction:

1. **Louvers**    2. **Pane**

## **B. KNOWLEDGE, ATTITUDES AND PRACTICES TOWARDS**

### **MALARIA, ITS TRANSMISSION AND PREVENTION**

19. Have you ever heard of malaria?

1. **Yes**      2. **No**

20. If yes to question 19 above from whom?

1. **Radio**      2. **Television**    3. **Health Facility**

4. **Community Relay Agent (CRA)**      5. **Tracts/posters**      6. **Others**

21. What does malaria mean to you? \_\_\_\_\_

22. How would you know if someone has malaria? \_\_\_\_\_

23. How many of your household members have presented with signs of malaria during the past four months: a) Children less than five years? \_\_\_\_\_

b) Pregnant women? \_\_\_\_\_

24. What are the effects of malaria in a child less than five years? \_\_\_\_\_

---

25. What are the effects of malaria in a pregnant woman? \_\_\_\_\_

---

26. Malaria is a dangerous disease, what do you say?

1. Strongly disagree   2. Disagree   3. Neutral   4. Agree   5. Strongly agree

27. If you agree to 26 above, what makes malaria a dangerous disease? \_\_\_\_\_

---

28. How can someone get malaria? \_\_\_\_\_

---

29. How can one prevent malaria? \_\_\_\_\_

---

### **C. AWARENESS, KNOWLEDGE AND POSSESSION OF MOSQUITO BED NETS**

30. Have you heard of insecticide treated bednets?

1. Yes                      2. No

31. If yes to question 30 above, from whom?

1. Radio            2. Television            3. Health unit            4. CRA            5. Tract

6. Others \_\_\_\_\_

32. What do you think of mosquito bednets as a preventive measure against malaria?

1. Very bad   2. Bad   3. Good   4. Very good   5. Excellent

33. What in your opinion are the benefits from using mosquito bednets? \_\_\_\_\_

---

34. In your culture or religion, are there any prohibitions against sleeping under bednets?

1. **Yes**          2. **No.**

35. If yes to question 34 above, what ill will befall you if you sleep under a bednet? \_\_\_\_\_

---

36. What other reasons might prevent people from sleeping under a mosquito bednet?

---

---

37. Do you have any mosquito bednet in your house?

1. **Yes**   2. **No**

38. If No. to 37 above, Why?

1. **Was not present during distribution**    2. **Was not given during distribution**

3. **Have not started ANC**   4. **Does not have money**   5. **Don't not need one**

39. Do you know the cost of an ITN in the market?

1. **Yes**          2. **No**

40. If yes to 37 above, how many mosquito bednets are there in this household? \_\_\_\_\_

41. Where/on what occasion did you get it (them).

1. **ANC**          2. **During a health campaign**

3. **Market**    4. **School**    5. **NGO**      6. **Red Cross**

42. Do you know where your Community Treatment Unit (CTU) for MBNS is located?

1. **Yes**          2. **No**

43. If yes to question 42 above, Have you ever taken your net there for retreatment?

1. **Yes**          2. **No**

44. If yes to 43 above, was it retreated?

1. Yes      2. No

45. If No. to 44, why?      1. CHEW not present      2. Insecticide not available.

3. Was charged to pay money    4. Others (specify)\_\_\_\_\_

46. How many of them are of short duration (need to be treated every six months)?\_\_\_\_\_

47. When was (were) it (they) last treated?

1. Less than six months.      2. More than six months

48. Have they been washed after the last retreatment?

1. Yes      2. No

48. How many long lasting insecticide nets are there (need to be treated after five years)?\_\_\_\_\_

50. When did you obtain it (them)?

1. Less than five years      2. More than five years

51. When was (were) it(they) last retreated?

1. less than three years    2. More than three years    3. Never retreated.

52. How many times have they been washed after the last retreatment?\_\_\_\_\_

53. What colour (s) is (are) it (they)? \_\_\_\_\_  
\_\_\_\_\_

54. How do you feel about the colours? 1. Very uncomfortable 2. Uncomfortable 3. Neutral 4. Comfortable 5. Very comfortable

55. What colour do you prefer if you are not comfortable with these ones? \_\_\_\_\_  
\_\_\_\_\_

56. Why would you prefer such colour? \_\_\_\_\_  
\_\_\_\_\_

57. What is (are) the shape(s)

1. Rectangular \_\_\_\_\_

2. Conical \_\_\_\_\_

58. Which of them is easier to mount?

1. Rectangular

2. Conical

59. Which shape do you prefer most? \_\_\_\_\_

60. What makes you prefer the said shape? \_\_\_\_\_

#### **D. UTILIZATION OF MOSQUITO BED NETS**

61. Does your household use the available bed nets?      1. Yes      2. No

62. If yes to question 61 above, When? 1. Always    2. Rainy Season    3. Dry season

63. Why do you prefer the period above? \_\_\_\_\_

64. If No. to 61 above, what are some of the reasons for not using the available nets?  
\_\_\_\_\_

65. Did all children under five years in this household sleep under a bednet last night?

1. Yes      2. No

66. If no to question 65 above, why? \_\_\_\_\_

67. Did all the pregnant women in this household sleep under a bednet last night?

1. Yes      2. No

68. If no to question 67 above, why? \_\_\_\_\_

69. Which group of people in your household should be given priority to sleep under ITN?

1. Children under-five years

2. Pregnant women    3. Children older

than five

4. Father/or Mother

5. Grand-parents.

70. Have you experienced any problems/difficulties using ITNS/LLINS?

1. Yes                      2. No

71. If yes to question 70 above, list them \_\_\_\_\_

72. Do you know the Community Relay Agent (CRA) for malaria activities for your community?            1. Yes            2. No.

73. If yes to question 72 above, how many times has he visited your home since the beginning of the rainy season?

1. Never            2. Once            3. Twice            4. Thrice            5. Four times plus

74. What are some of the activities carried out by the CRA during home visits.

---

75. How do you appreciate the work of the CRA in your community?

1. Very poor. 2. Poor            3. Good            4. Very Good            5. Excellent.

**Questions 76-82 are pregnant women only.**

76. How old is your pregnancy? \_\_\_\_\_ months

77. How far is the Nearest Health unit from your home? \_\_\_\_\_ km

78. Have you registered for ANC?    1. Yes            2. No

79. If yes to question 78 above in what type of health facility?

1. Public            2. Confessional            3. Private

80. Did you receive an ITN at this health unit after registration?

1. Yes            2. No

82. If No. to question 78 above, why?

1. Pregnancy still too young            2. No money  
3. Health facility too far            4. ANC not necessary

**I have exhausted my questions for you. Do you have any worries or questions?**

**CAN WE NOW HAVE A LOOK AT THE BEDNETS THAT YOU HAVE?**

**BEDNET CHECKLIST**

1. How many nets have you seen in the household? \_\_\_\_\_

2. How many are hung over the bed? \_\_\_\_\_

3. Are they properly hung?            **1. Yes**            **2. No**

4. Of those hung over the beds, how many are

**1. Neither torn nor have holes** \_\_\_\_\_

**2. Torn or have holes?** \_\_\_\_\_

5. If not hung over the bed, in what condition are they?

**1. Sealed in the package 2. Hung on the windows or door. 3. Just folded and placed somewhere in the room 4. Others**

\_\_\_\_\_

**Comments**

\_\_\_\_\_

\_\_\_\_\_

\_\_\_\_\_

\_\_\_\_\_

\_\_\_\_\_

\_\_\_\_\_

**DATE INTERVIEW DONE**

**INTERVIEWER'S NAME AND**

**SIGNATURE**

\_\_\_\_\_

\_\_\_\_\_
